# Supplementary material
Source: publisher figshare collection journal article supplement (https://tandf.figshare.com/articles/dataset/_/5349100)
Supplement: Supplementary file 1 [file 2]

Archive with 2 entries (2 files):
- ugmb_a_1362078_sm1507.pdf
- ugmb_a_1362078_sm2879.pdf
